# Supplementary material
Source: publisher figshare collection journal article supplement (https://karger.figshare.com/articles/dataset/_/7405919)

## Enrollment

Assessed for eligibility (n= 45)

Excluded (n = 1)  
♦ Deceased (n = 1)

Randomized (n = 44)

## Allocation

Allocated to **CG** (n = 22)  
♦ Baseline assessment with regular shoes (n= 22)  
♦ Received **New-Balance shoes**

Allocated to **IG** (n = 22)  
♦ Baseline assessment with regular shoes (n= 22)  
♦ Received **AFOs + New-Balance shoes**

## Follow-Up

Lost to 1-month assessment (n = 2)  
Received **New-Balance shoes**  
♦ Back pain (n = 1)  
♦ Loss of contact (n = 1)

Lost to 1-month assessment (n = 0)

Lost to 3-month follow-up (n = 1)  
♦ Deceased (n = 1)

Lost to 3-month follow-up (n = 6)  
♦ Deceased (n = 1)  
♦ Relocation (n = 2)  
♦ Loss of contact (n = 2)  
♦ Loss of ambulatory ability (n = 1)

Lost to 6-month follow-up (n = 1)  
♦ Loss of ambulatory ability (n = 1)

Lost to 6-month follow-up (n = 1)  
♦ Deceased (n = 1)

## Analysis

Analyzed  
♦ Baseline assessment samples (n = 22)  
♦ 6-month follow-up samples (n = 18)

Analyzed  
♦ Baseline assessment samples (n = 22)  
♦ 6-month follow-up samples (n = 15)

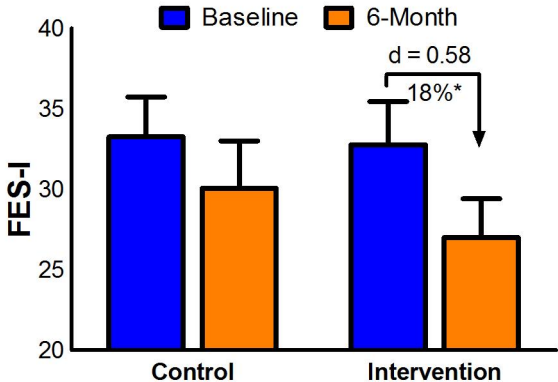

Supplement: Supplementary file 1 [file 4]
